# Supplementary material
Source: PubMed Central journal article supplement (PMC9835553)
Supplement: NIHMS1856371-supplement-Supplementary_Material.pdf [file NIHMS1856371-supplement-Supplementary_Material.pdf]

# Remodeling of the Cortical Structural Connectome in Posttraumatic Stress Disorder: Results from the ENIGMA-PGC PTSD Consortium

## *Supplement*

### **Supplementary Methods**

#### ***Clinical Measurements***

Most sites used clinician-administered measures such as the Structured Clinical Interview for DSM (SCID) (First, 2015) or Clinician-Administered PTSD Scale (CAPS) (Weathers et al., 2018; Weathers, Keane, & Davidson, 2001) to ascertain PTSD diagnosis. The majority used DSM-IV criteria, but a small subset of sites used DSM-5 criteria. Severity of PTSD symptoms was derived from the same measures used for diagnosis, except when a clinician-administered measure (e.g., SCID) lacked severity information (see **Supplementary Table S1**). The measures reflect PTSD diagnosis and symptoms in the month before scanning. Sites used a mix of clinician-administered and self-report instruments to diagnose depression. We harmonized depression data by assigning participants to major depressive disorder (MDD) or control groups based on a standardized depression severity cut-off score. Most sites reported depression severity using the Beck Depression Inventory-II (BDI-II) (Beck, Steer, & Brown, 1996), while other scales included the Center for Epidemiologic Studies Depression Scale (CES-D) (Radloff, 1977), Hamilton Depression Rating Scale (HAM-D) (Hamilton, 1980), Depression Anxiety Stress Scales (DASS) (Lovibond & Lovibond, 1995), and Children's Depression Inventory (CDI) (Kovacs, 1985).

### ***Imaging Data Preprocessing***

Anatomical brain images were preprocessed at Duke University with a standardized neuroimaging and QC pipeline developed by the ENIGMA Consortium (<http://enigma.ini.usc.edu/protocols/imaging-protocols/>) (Wang et al., 2020). CT and SA measurements were generated by FreeSurfer software (<https://surfer.nmr.mgh.harvard.edu>) based on the Destrieux atlas (Destrieux, Fischl, Dale, & Halgren, 2010) that contains 74 regions per hemisphere. In brief, white matter surfaces were deformed toward the gray matter boundary at each surface vertex. CT was calculated based on the average distance between the parcellated portions of white and pial surfaces within each region, and SA was measured as the area within each region. The CT and SA estimates for each region and subject were entered into further respective analyses. The quality of structural images per hemisphere from each site (in 21 of 29 sites) was assessed with the Euler number, which is a measure of topological complexity of the reconstructed cortical surface (Rosen et al., 2018). As shown in **Supplementary Table S3**, the Euler number did not show significant difference between PTSD and non-PTSD groups at most sites except for Duke University (DeBellis) and INTRUST.

### ***Harmonizing Data Across Sites***

*ComBat* achieves harmonization by first modeling expected imaging features as linear combinations of the biological variables and site effects whose error term is further modulated by site-specific scaling factors. Secondly, *ComBat* applies empirical Bayes to improve the estimation of site parameters for small samples. This method effectively removes unwanted sources of site variability thereby increasing the power and reproducibility of subsequent statistical analyses of multi-site studies on CT (Radua et al., 2020; D. Sun et al., 2021). PTSD diagnosis, age, and sex were designated as biological variables, but PTSD severity and

depression diagnosis were not designated as biological variables because they were highly correlated with PTSD diagnosis, and some participants were missing information on PTSD severity and depression.

### ***Adjusting for Confounding Factors***

We did not include sex as a regressor for the investigation of the interaction between sex and PTSD diagnosis. Similarly, we did not include age and age<sup>2</sup> as regressors for the investigation of age effects on PTSD diagnosis. We then entered the residuals of the linear model into the following analyses.

### ***Replication Analyses***

To test the reliability of our results comparing actual networks to random networks in the PTSD group, non-PTSD group, and PTSD versus non-PTSD, we conducted 5,000 iterations of leaving out three sites to calculate the 95% confidence interval of mean SC for each type of network. For each iteration, we randomly removed 3 out of 29 sites (~10% of all sites) and performed the same analyses on the remaining data including data harmonization, adjustment for covariates, calculation of the mean SC of the actual network with top-*n* regions for the PTSD group, non-PTSD group, and the between-group comparison as described above. Our approach is more robust than performing a split sample reproducibility test, which may lead to a false confirmation or a false rejection of results. Removing three sites is superior to removing a single site at each iteration given that some of the sites have relatively small sample sizes, which may also produce spurious results.

### ***Global and Individual Tests***

We performed two tests of statistical significance that were complementary to each other – the global test and the individual test. The mean SC between  $n$ -regions was plotted as a function of  $n$  (from  $n = 2$  to 148; **Fig. 1C**). As implemented by Wannan *et al.* (2019), the area under this curve (AUC) was used to compute the  $p$ -value for the global test, which was the proportion of AUC values from the randomly generated networks of  $n$ -regions that exceeded or equaled the AUC values for the actual networks of top- $n$  regions. The  $p$ -value for the individual test was calculated for each value of  $n$  as the proportion of mean SC values from randomly chosen sets of  $n$  regions that exceeded or equaled the mean SC from the actual top- $n$  network. The global  $p$ -value gives an overall estimate of the connections regardless of network size, while the individual  $p$ -value reflects how connections are influenced by the size of cortical networks. Both global and individual  $p$ -values were derived from two-tailed tests.

### ***Corrections for Multiple Comparisons***

The Bonferroni method was employed to correct for the number of comparisons, *i.e.*, 2 (CT-based and SA-based networks) by 3 (atrophic, hypertrophic, and stable networks), in global tests and individual tests. This method was also employed to correct for the 6 comparisons (*i.e.*, all pairs among 4 subgroups) where there was a significant interaction between PTSD diagnosis and depression, or sex, or age. The false discovery rate (FDR) method (Benjamini & Hochberg, 1995) was further employed in individual tests to correct for network size (totally 147,  $n = 2$  to 148). All  $p$ -values shown are corrected for multiple comparisons.

### ***Correlations Between Regional Average SC and Effect Size of Cortical Changes***

To examine whether brain hubs that are strongly connected with other areas (Crossley *et al.*, 2014), played a role in the spatial distribution of PTSD-related cortical changes, we investigated the association between the effect size of cortical changes for each region and the average of positive SC between said region and all the other cortical regions. This association was calculated by Pearson's correlation across regions separately in CT-based and SA-based networks in PTSD and non-PTSD groups.

### ***Effects of PTSD Symptom Severity***

To understand the influence of PTSD symptom severity on SCNs, we partitioned the sample into five ranges of very low (0 - 3), low (4 - 19), moderate (20 - 45), high (46 - 67), and very high (> 67) CAPS score (see **Supplementary Table S8**) with comparable sample sizes according to CAPS score quintiles. We were unable to directly analyze the effects of continuous measures of PTSD symptom severity because the mean SC was calculated for the whole group rather than for each participant. We investigated only participants with scores based on DSM-IV symptoms given their relatively large sample size ( $N = 1611$ ), while omitting participants with DSM-5 symptoms scores. We examined the difference in mean SC by performing pairwise comparisons between all five groups.

## Supplementary Results

### ***Methodologic Confirmation of Rank Ordering***

*Actual versus Random Networks in PTSD.* As displayed in **Fig. 3** and **Table 2**, global tests showed that PTSD patients had higher mean SC in CT-based ( $p < 0.001$ ) and SA-based ( $p = 0.017$ ) atrophic networks, CT-based ( $p = 0.029$ ) and SA-based ( $p = 0.017$ ) hypertrophic networks, and CT-based ( $p < 0.001$ ), but not SA-based ( $p > 0.5$ ) stable networks when compared to the corresponding random networks. No individual test results survived correction ( $p$ -values  $> 0.05$ ). The results of this analysis serve as methodologic confirmation for selecting regions, which are rank-ordered by effect size, in forming SCNs of interest. The analysis of stable networks highlights this point most clearly. Although the stable regions individually differ the least between groups, the networks they form differ significantly in SC between group, except for SA-based stable SCNs.

*Actual versus Random Networks in non-PTSD.* As displayed in **Fig. 4** and **Table 2**, global tests showed that the non-PTSD participants had higher mean SC in CT-based ( $p < 0.001$ ) and SA-based ( $p < 0.001$ ) atrophic networks, in SA-based ( $p = 0.014$ ), but not CT-based ( $p = 0.139$ ) hypertrophic networks, and neither CT-based ( $p = 0.264$ ) nor SA-based ( $p = 0.732$ ) stable networks when compared to the corresponding random networks. Individual tests showed that the non-PTSD participants had higher mean SC in CT-based atrophic networks consisting of the top-69, 82, and 93 regions ( $p$ -values  $< 0.05$ ), compared to the corresponding random networks. No other individual test results survived correction ( $p$ -values  $> 0.05$ ). The results of this analysis serve as methodologic confirmation for selecting regions, which are rank-ordered by effect size, in the formation of *atrophic* SCNs of interest. Methodologic confirmation was achieved for SA-

based hypertrophic SCNs, but not for CT-based hypertrophic SCNs. Methodologic confirmation for stable SCNs was not achieved in the non-PTSD group.

### ***Correlations between Regional Average SC and Effect Size of Cortical Changes***

No significant correlation was found in CT-based ( $R = -0.091$ ,  $p = 0.270$ ) and SA-based ( $R = 0.021$ ,  $p = 0.795$ ) networks of patients with PTSD. No significant correlation was found in CT-based ( $R = -0.110$ ,  $p = 0.183$ ) and SA-based ( $R = -0.003$ ,  $p = 0.967$ ) networks of non-PTSD participants. These negative results suggest that the spatial distribution of PTSD-related cortical changes is not related to the brain hubs that are strongly connected to other areas (reflected by high SC between said region and all the other cortical regions), but are associated with the strength of connections among regions.

*Effects of PTSD Symptom Severity.* As displayed in **Supplementary Fig. S3**, global tests showed that, in the CT-based atrophic networks (**Supplementary Fig. S3A**), the low-severity group had greater mean SC than the very-low severity group ( $p < 0.001$ ), and the high-severity group had greater mean SC than both the very low severity group ( $p < 0.001$ ) and the very-high severity group ( $p = 0.048$ ).

In the SA-based atrophic networks (**Supplementary Fig. S3B**), the very-low group has greater mean SC than the low group ( $p < 0.001$ ), the high group ( $p < 0.001$ ), and the very-high group ( $p < 0.001$ ). The moderate group had greater mean SC than both the low group ( $p < 0.001$ ) and the high group ( $p < 0.001$ ). The very-high group had greater mean SC than the low group ( $p = 0.024$ ) and the high group ( $p = 0.024$ ).

In the CT-based hypertrophic networks (**Supplementary Fig. S3C**), the very-high group had greater mean SC than the very-low group ( $p < 0.001$ ), the low group ( $p < 0.001$ ), and the high

group ( $p < 0.001$ ). The moderate group also had greater mean SC than the high group ( $p < 0.001$ ).

In the SA-based hypertrophic networks (**Supplementary Fig. S3D**), the low group ( $p = 0.048$ ), the moderate group ( $p = 0.048$ ), the high group ( $p < 0.001$ ), and the very-high group ( $p = 0.024$ ) all had greater mean SC than the very-low group. The high group had greater mean SC than the low group ( $p = 0.024$ ).

In the CT-based stable networks (**Supplementary Fig. S3E**), the very-low group had greater mean SC than the low group ( $p < 0.001$ ), the moderate group ( $p < 0.001$ ), the high group ( $p < 0.001$ ), and the very high group ( $p < 0.001$ ). The very high group had greater mean SC than the low group ( $p < 0.001$ ).

In the SA-based stable networks (**Supplementary Fig. S3F**), the high group had greater mean SC than the very low group ( $p < 0.001$ ).

Individual tests showed that very low group had greater mean SC compared to the low group in SA-based atrophic networks consisting of the top-72, 77 and 81 regions ( $p$ -values  $< 0.05$ ). The low group had greater mean SC compared to the very low group in the SA-based hypertrophic networks consisting of the top-145 regions ( $p$ -values  $< 0.05$ ). The high group had greater mean SC than the very low group in SA-based hypertrophic networks consisting of the top-119, 121-131, 133, 139, 140 and 142 regions ( $p$ -values  $< 0.05$ ). No other between-group differences that were based on either global or individual tests survived correction ( $p$ -values  $> 0.05$ ).



## Supplementary Discussions

The cortical regions showing high SC with other regions may represent hubs in brain-network topology (Crossley *et al.*, 2014). Indeed, we reported previously that PTSD is accompanied by altered CT estimates as well as differences in nodal centrality in some brain hubs (D. L. Sun, Haswell, Morey, & de Bellis, 2019), which is also supported by an earlier study by Mueller *et al.* (2015). However, we did not find a significant relationship between the effect size of PTSD-related CT (or SA) change in any given region and its average connections with all the other regions. Our findings suggest that PTSD-related cortical changes are shaped by brain networks with strong covariance, rather than hubs that are highly connected to other regions.

We explored how the PTSD-related differences in SCNs are modulated by sex and age, and whether the SCNs would be modulated by PTSD symptom severity. We found that (**Supplementary Fig. S1**), females with PTSD and males without PTSD had greater mean SC in CT-based atrophic networks than females without PTSD. Males without PTSD had greater mean SC in CT-based stable networks than males with PTSD and females without PTSD. We also found that (**Supplementary Fig. S2**) some participant groups exhibited an inverted U-shaped relationship between age and mean SC in CT-based atrophic networks (peaking in 20-30 year-old in participants without PTSD and 15-20 year-old patients with PTSD) and SA-based hypertrophic networks (peaking in 10-15 year-old participants for both groups). We found significant PTSD-related differences of mean SC in different age groups, particularly < 10 year-olds, as demonstrated by higher mean SC in CT-based hypertrophic and stable networks, lower mean SC in CT-based atrophic networks, and lower mean SC in SA-based hypertrophic networks. Our findings (**Supplementary Fig. S3**) showed that PTSD symptom severity is non-linearly associated with mean SC across various networks.

A previous study investigating the diffusion-based structural connectome in youth documented that males have stronger connections between modes associated with perception and

coordinated action, whereas females have stronger connections between analytical and intuitive processing modes (Ingalhalikar et al., 2014), demonstrating the sex-related differences in brain connections. We found that in non-PTSD participants, males have higher mean SC in the CT-based atrophic and stable networks than females. These results demonstrate, for the first time, that males and females have different networks to propagate PTSD-related cortical morphometric changes. Moreover, we found that PTSD versus non-PTSD females have higher mean SC in the CT-based atrophic networks, whereas PTSD versus non-PTSD males have lower mean SC in the CT-based stable networks. These results clearly highlight sex-differences in the cortical networks are modulated by PTSD. It is well known that females have higher risk of developing PTSD than males after exposure to a criterion-A traumatic event (Ramikie & Ressler, 2018). There are several potential explanations for sex differences in PTSD including the type of trauma experienced, the age at the time of trauma exposure, individual differences in perceptions of threat and loss of control, the levels of peritraumatic dissociation, social support, comorbid drugs and alcohol that may be used to regulate trauma-related symptoms, and the acute psychobiological reactions to trauma (Olf, Langeland, Draijer, & Gersons, 2007). Studies in recent years investigating specific brain regions and connections suggest that early trauma exposure is associated with a smaller limbic system and greater connectivity of salience hubs in males, whereas an enlarged amygdala and weaker connectivity of salience hubs in females (Helpman et al., 2017). Our findings of sex-related differences in SCNs may be associated with varying responses to traumatic experiences and the development of PTSD in males and females. Future longitudinal studies may help to further elaborate the associations between sex-specific brain network topography and elevated rates of PTSD.

The present study characterized trajectories of cortical networks across the life span with a cross-sectional analysis of eight developmental periods. A previous study by DuPre and Spreng (2017) on age-related SC based on grey matter volume in healthy individuals found: (1) an

inverted U-shaped relationship between age and SC peaking at around 40 years, and (2) a decline in SC strength over the life span. In the present study, PTSD and non-PTSD participants exhibited an inverted U-shaped relationship between age and mean SC in CT-based atrophic networks (peaking at 20-30 years in non-PTSD and 15-20 years in PTSD), and SA-based hypertrophic networks (peaking at 10-15 years in both PTSD and non-PTSD groups). These peaks in CT-based and SA-based networks appear much earlier than the peaks in grey matter structural networks reported by DuPre and Spreng (2017). There is no clear trend of CT-based or SA-based mean SC decline over the life span in either PTSD or non-PTSD participants. These differences suggest that the modulation of structural connections by age are determined by the type of morphometric measures. We found significant PTSD versus non-PTSD group differences in mean SC across different age groups, particularly age < 10 years, as signaled by higher mean SC in CT-based hypertrophic and stable networks, as well as lower mean SC in CT-based atrophic networks and SA-based hypertrophic networks. Our results suggest that multiple networks undergo transformation in a coordinated fashion to support the development of the brain as well as PTSD symptoms, particularly during early childhood.

Parallel network findings were observed between groups defined by DSM diagnosis of PTSD and groups formed based on PTSD symptom severity. Consistent with findings based on DSM diagnosis of PTSD that showed lower mean SC in SA-based atrophic networks, we found symptom severity groups in the low, high, and very-high ranges had lower mean SC in the SA-based atrophic networks than groups with symptom severity in the very low range. However, PTSD symptom severity is non-linearly associated with mean SC across various networks. The mean SC of some groups with intermediate symptom severity were beyond the range defined by the mean SC of groups with very-low and very-high symptom severity in CT-based and SA-based atrophic networks. These findings suggest that PTSD diagnosis and symptom severity share features in common, but are quite distinct in relation to cortico-cortical connections. While

PTSD diagnosis and symptom severity are strongly correlated, they are not equivalent since diagnosis of PTSD requires additional information such as the presence of a minimum number of symptoms from each symptom cluster. Therefore, while the relationship between PTSD symptom severity and SC is helpful to the interpretation of network topography, it does not supplant direct comparisons between diagnostic groupings. Moreover, the participants who had CAPS scores based on DSM-IV symptoms were only a subset of all participants in the present study. The findings derived from these participants may not be generalized to a much broader population.

**Supplementary References**

Beck, A. T., Steer, R. A., & Brown, G. K. (1996). *Manual for the Beck Depression Inventory-II*.

San Antonio, TX: Psychological Corporation.

Benjamini, Y., & Hochberg, Y. (1995). Controlling the False Discovery Rate - a Practical and Powerful Approach to Multiple Testing. *Journal of the Royal Statistical Society Series B-Statistical Methodology*, 57(1), 289-300. doi:DOI 10.1111/j.2517-6161.1995.tb02031.x

Crossley, N. A., Mechelli, A., Scott, J., Carletti, F., Fox, P. T., McGuire, P., & Bullmore, E. T. (2014). The hubs of the human connectome are generally implicated in the anatomy of brain disorders. *Brain*, 137, 2382-2395. doi:10.1093/brain/awu132

Destrieux, C., Fischl, B., Dale, A., & Halgren, E. (2010). Automatic parcellation of human cortical gyri and sulci using standard anatomical nomenclature. *Neuroimage*, 53(1), 1-15. doi:10.1016/j.neuroimage.2010.06.010

DuPre, E., & Spreng, R. N. (2017). Structural covariance networks across the life span, from 6 to 94 years of age. *Network Neuroscience*, 1(3), 302-323. doi:10.1162/netn\_a\_00016

First, M. B. (2015). Structured Clinical Interview for the DSM (SCID). In R. L. C. a. S. O. Lilienfeld (Ed.), *The Encyclopedia of Clinical Psychology* (pp. 1-6).

Hamilton, M. (1980). Rating Depressive Patients. *Journal of Clinical Psychiatry*, 41(12), 21-24.

Helpman, L., Zhu, X., Suarez-Jimenez, B., Lazarov, A., Monk, C., & Neria, Y. (2017). Sex Differences in Trauma-Related Psychopathology: a Critical Review of Neuroimaging Literature (2014-2017). *Current Psychiatry Reports*, 19(12). doi:ARTN 104

10.1007/s11920-017-0854-y

Ingalhalikar, M., Smith, A., Parker, D., Satterthwaite, T. D., Elliott, M. A., Ruparel, K., . . . Verma, R. (2014). Sex differences in the structural connectome of the human brain. *Proceedings of the National Academy of Sciences of the United States of America*, 111(2), 823-828. doi:10.1073/pnas.1316909110

- Kovacs, M. (1985). The Children's Depression, Inventory (CDI). *Psychopharmacol Bull*, 21(4), 995-998.
- Lovibond, P. F., & Lovibond, S. H. (1995). The structure of negative emotional states: comparison of the Depression Anxiety Stress Scales (DASS) with the Beck Depression and Anxiety Inventories. *Behav Res Ther*, 33(3), 335-343. doi:10.1016/0005-7967(94)00075-u
- M., H. (1960). A rating scale for depression. *Journal of Neurology, Neurosurgery and Psychiatry*, 23, 56-62.
- Mueller, S. G., Ng, P., Neylan, T., Mackin, S., Wolkowitz, O., Mellon, S., . . . Weiner, M. W. (2015). Evidence for disrupted gray matter structural connectivity in posttraumatic stress disorder. *Psychiatry Research-Neuroimaging*, 234(2), 194-201. doi:10.1016/j.pscychresns.2015.09.006
- Olf, M., Langeland, W., Draijer, N., & Gersons, B. P. R. (2007). Gender differences in posttraumatic stress disorder. *Psychological Bulletin*, 133(2), 183-204. doi:10.1037/0033-2909.133.2.183
- Radloff, L. S. (1977). The CES-D scale: A self report depression scale for research in the general population. *Applied Psychological Measurements*, 1, 385-401.
- Radua, J., Vieta, E., Shinohara, R., Kochunov, P., Quide, Y., Green, M. J., . . . collaborators, E. C. (2020). Increased power by harmonizing structural MRI site differences with the ComBat batch adjustment method in ENIGMA. *Neuroimage*, 218, 116956. doi:10.1016/j.neuroimage.2020.116956
- Ramikie, T. S., & Ressler, K. J. (2018). Mechanisms of Sex Differences in Fear and Posttraumatic Stress Disorder. *Biological Psychiatry*, 83(10), 876-885. doi:10.1016/j.biopsych.2017.11.016

- Rosen, A. F. G., Roalf, D. R., Ruparel, K., Blake, J., Seelaus, K., Villa, L. P., . . . Satterthwaite, T. D. (2018). Quantitative assessment of structural image quality. *Neuroimage*, *169*, 407-418. doi:10.1016/j.neuroimage.2017.12.059
- Sun, D., Rakesh, G., Haswell, C. C., Logue, M., Lexi Baird, C., O'Leary, B. M., . . . Morey, R. A. (2021). A Comparison of Methods to Harmonize Cortical Thickness Measurements Across Scanners and Sites. *bioRxiv*, 2021.2009.2022.461242. doi:10.1101/2021.09.22.461242
- Sun, D. L., Haswell, C. C., Morey, R. A., & de Bellis, M. D. (2019). Brain structural covariance network centrality in maltreated youth with PTSD and in maltreated youth resilient to PTSD. *Development and Psychopathology*, *31*(2), 557-571. doi:10.1017/S0954579418000093
- Wang, X., Xie, H., Chen, T., Cotton, A. S., Salminen, L. E., Logue, M. W., . . . Liberzon, I. (2020). Cortical volume abnormalities in posttraumatic stress disorder: an ENIGMA-psychiatric genomics consortium PTSD workgroup mega-analysis. *Molecular Psychiatry*. doi:10.1038/s41380-020-00967-1
- Weathers, F. W., Bovin, M. J., Lee, D. J., Sloan, D. M., Schnurr, P. P., Kaloupek, D. G., . . . Marx, B. P. (2018). The Clinician-Administered PTSD Scale for DSM-5 (CAPS-5): Development and initial psychometric evaluation in military veterans. *Psychol Assess*, *30*(3), 383-395. doi:10.1037/pas0000486
- Weathers, F. W., Keane, T. M., & Davidson, J. R. (2001). Clinician-administered PTSD scale: a review of the first ten years of research. *Depression and Anxiety*, *13*(3), 132-156. doi:10.1002/da.1029

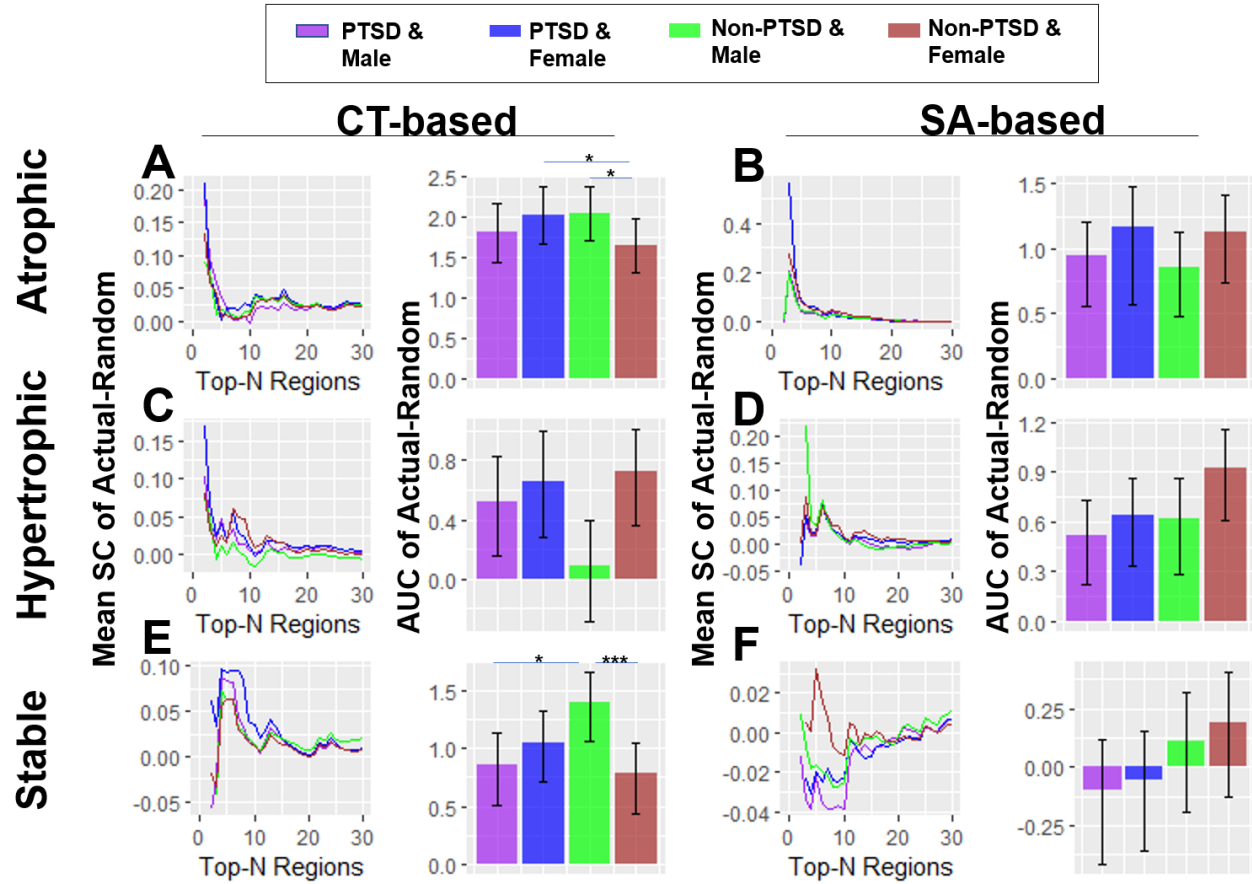

**Supplementary Figure S1.** Effects of PTSD x sex interaction. Global tests showed that (A) females with PTSD ( $p = 0.029$ ) and males without PTSD ( $p = 0.014$ ) had greater mean SC in CT-based atrophic networks than females without PTSD. (E) males without PTSD had greater mean SC in CT-based stable networks than males with PTSD ( $p = 0.014$ ) and females without PTSD ( $p < 0.001$ ). No significant PTSD x sex interaction effect (global  $p$ -values  $> 0.1$ ) was found in the other types of networks shown in (B), (C), (D) and (F). The curves of networks with up to 30 nodes were shown for illustrative purpose. Error bar denotes 95% confidence interval of 5,000 random networks. \*,  $p < 0.05$ ; \*\*\*,  $p < 0.001$ .



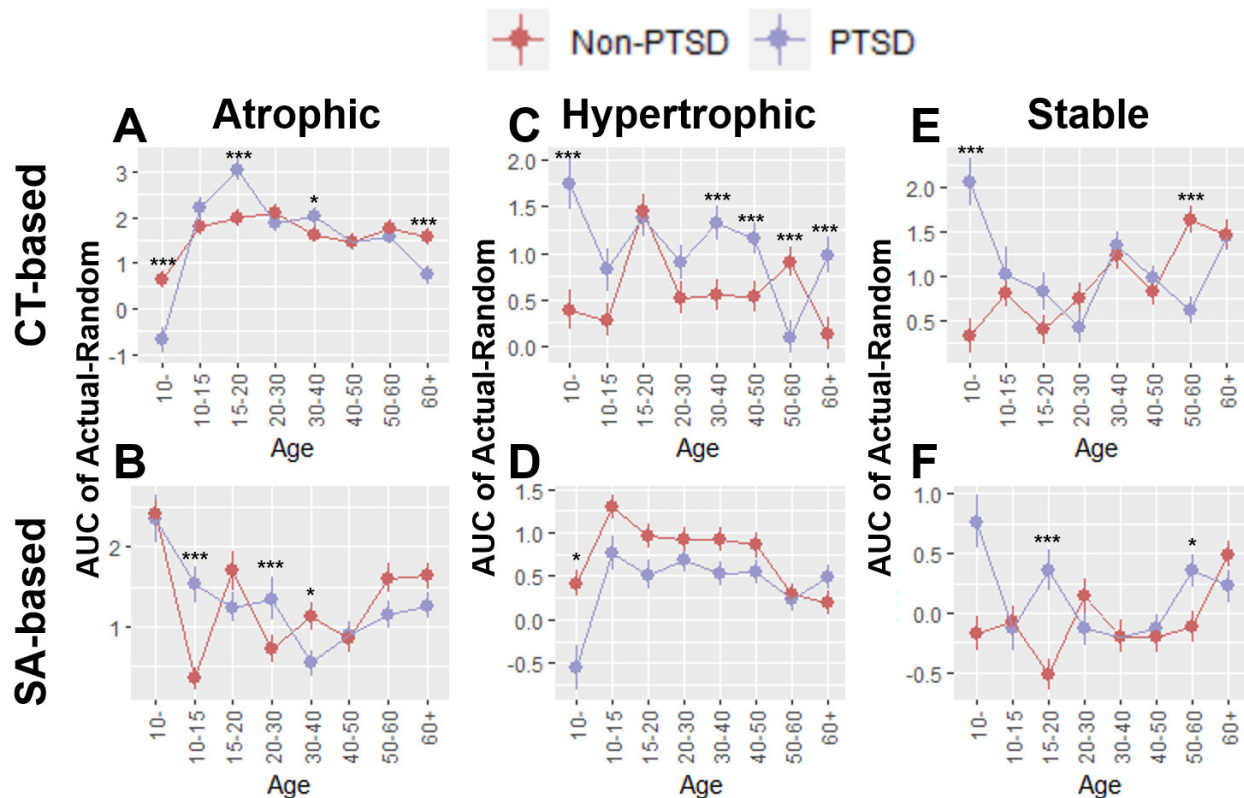

**Supplementary Figure S2.** Effects of PTSD x age interaction. An inverted-U relationship between age and mean SC was observed in (A) CT-based atrophic networks in both non-PTSD participants (peaking at 20-30 years old) and PTSD patients (peaking at 15-20 years old), and (D) SA-based hypertrophic networks in PTSD patients and non-PTSD patients (both peaking at 10-15 years old). PTSD-related differences in mean SC were observed in different age groups, especially <10 years old, represented by (A) lower mean SC in CT-based atrophic networks ( $p < 0.001$ ) and (D) SA-based hypertrophic networks ( $p = 0.019$ ), as well as (C) higher mean SC in CT-based hypertrophic ( $p < 0.001$ ) and (E) stable ( $p < 0.001$ ) networks, in patients with PTSD compared to non-PTSD participants. We did not show the curves of mean SC per age group for simplicity. The curves of networks with up to 30 nodes were shown for illustrative purpose. Error bar denotes 95% confidence interval of 5,000 random networks. \*,  $p < 0.05$ ; \*\*\*,  $p < 0.001$ .

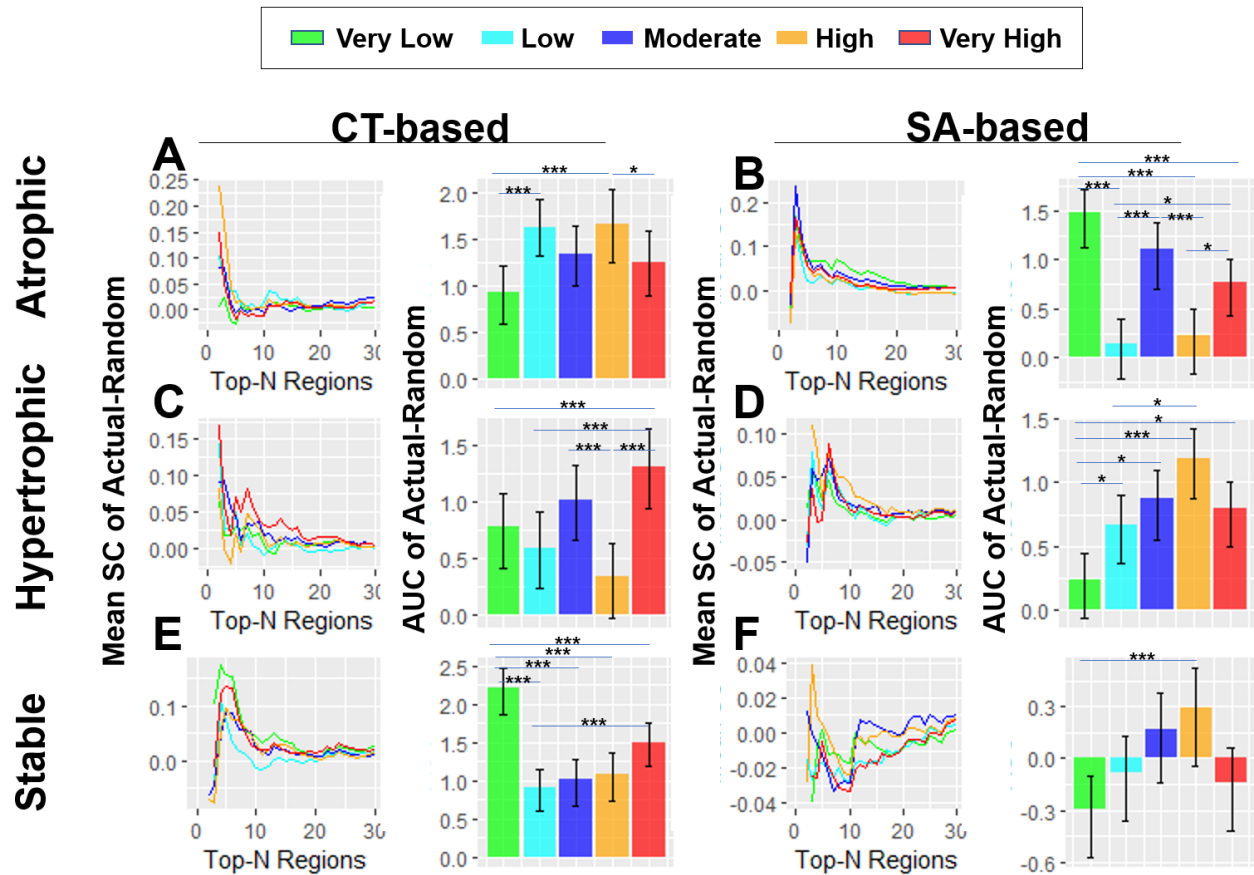

**Supplementary Figure S3.** Effects of PTSD symptom severity. Subgroups based on CAPS score: very low, 0-3; low, 4-19; moderate, 20-45; high, 46-67; very high, >67. The curves of networks with up to 30 nodes were shown for illustrative purpose. Error bar denotes 95% confidence interval of 5,000 random networks. \*,  $p < 0.05$ ; \*\*\*,  $p < 0.001$ .

**Supplementary Table S1. Specific psychometric instruments per site.**

| Site                                     | PTSD Tool              | MDD Diagnoses Tool | Depression Symptom Severity Tool |
|------------------------------------------|------------------------|--------------------|----------------------------------|
| <b>Duke University</b>                   | CAPS-4/CAPS-5/SCID     | BDI-II             | BDI-II                           |
| <b>McLean</b>                            | CAPS-5                 | BDI-II             | BDI-II                           |
| <b>Toledo</b>                            | CAPS-4                 | MINI               | DASS/CESD                        |
| <b>West Haven</b>                        | CAPS-4                 | SCID               | BDI-II                           |
| <b>Yale</b>                              | CAPS-4                 | SCID               | N/A                              |
| <b>UCAS</b>                              | PCL-5                  | CES-D              | CES-D                            |
| <b>ADNIDOD</b>                           | CAPS-4                 | GDS                | GDS                              |
| <b>Emory GTP</b>                         | CAPS-4/PSS             | BDI-II             | BDI-II                           |
| <b>Stellenbosch</b>                      | MINI/CAPS-5            | N/A                | N/A                              |
| <b>Columbia</b>                          | CAPS-4                 | HAMD               | HAMD                             |
| <b>Ghent</b>                             | MINI                   | BDI-II             | BDI-II                           |
| <b>INTRUST</b>                           | MINI/CAPS-4/PCL-M/SCID | PHQ9               | PHQ9                             |
| <b>UNSW</b>                              | CAPS-4                 | HAMD               | HAMD                             |
| <b>Leiden</b>                            | ADIS                   | CDI                | CDI                              |
| <b>University of Washington</b>          | DISC/CAPS-5/UCLA-PI    | CDI                | CDI                              |
| <b>DUKE (DeBellis)</b>                   | K-SADS-PL              | N/A                | N/A                              |
| <b>Mannheim</b>                          | SCID/DTS               | BDI-II             | BDI-II                           |
| <b>University of Wisconsin-Madison</b>   | CAPS-4                 | BDI-II             | BDI-II                           |
| <b>Groningen</b>                         | CAPS-4                 | BDI-II             | BDI-II                           |
| <b>Booster (AMC)</b>                     | CAPS-4                 | HADS-D             | HADS-D                           |
| <b>McLean (Rosso)</b>                    | CAPS-4                 | BDI-IA             | BDI-IA                           |
| <b>Stanford</b>                          | CAPS-4                 | N/A                | N/A                              |
| <b>Minneapolis VA</b>                    | CAPS-4                 | SCID               | SCID                             |
| <b>Muenster</b>                          | SCID                   | BDI-II             | BDI-II                           |
| <b>WACO VA</b>                           | PCL-5                  | BDI-II             | BDI-II                           |
| <b>University of Wisconsin-Milwaukee</b> | CAPS-5                 | DASS               | DASS                             |
| <b>South Dakota</b>                      | PCL-C / PCL-M          | CES-D/BDI-II       | CES-D/BDI-II                     |
| <b>University of Illinois-Chicago</b>    | CAPS-4/PCL-M           | BDI-II             | BDI-II                           |
| <b>University of Cape Town</b>           | MINI                   | BDI-II             | BDI-II                           |

Note: PTSD diagnostic tools: CAPS-4 (Clinician Administered PTSD Scale for DSM IV), MINI (Mini-International Neuropsychiatric Interview), CAPS-5 (CAPS for DSM-V), PSS (Posttraumatic Stress Scale), PCL-M (PTSD Checklist- Military), SCID (Structured Clinical Interview for DSM IV), PCL-C (PTSD Checklist- Civilian), PDS (Posttraumatic Diagnostic Scale), ADIS (Anxiety Disorder Interview Schedule), DTS (Davidson Trauma Scale). Childhood Trauma tools: CTQ (Childhood Trauma Questionnaire), TSCC (Trauma Symptom Checklist for Children), ETI (Early Trauma Inventory), SLESQ (Stressful Life Events Screening Questionnaire), TLEQ (Trauma Life

Events Questionnaire). Depression tools: GDS (Geriatric Depression Scale), HADS-D (Hospital Anxiety and Depression Scale-Depression), HAM-D (Hamilton Depression Scale), BDI (Beck Depression Inventory-II), PHQ-9 (Patient Health Questionnaire9), CESD (Center for Epidemiologic Studies Depression Scale), DASS 21 (Depression, Anxiety, Stress Scale-21 item short form), KSADS-PL (Schedule for Affective Disorders and Schizophrenia for School-Age Children--Present and Lifetime Version). Alcohol tool: AUDIT (Alcohol Use Disorders Identification Test), ASSIST (Alcohol, Smoking and Substance Involvement Screening Test).

**Supplementary Table S2.** MRI acquisition parameters.

(part I)

| Site                                   | Scanner | Model               | Strength | Channel | Sequence                      | Voxel size (mm)      |
|----------------------------------------|---------|---------------------|----------|---------|-------------------------------|----------------------|
| <b>Duke University</b>                 | GE      | MR750               | 3T       | 8       | FSPGR BRAVO                   | 0.9375x0.9375x0.9375 |
|                                        | GE      | EXCITE HD 3T        | 3T       | 8       | FSPGR BRAVO                   | 1 x 1 x 1            |
|                                        | GE      | 4T LX Nvi           | 4T       | 8       | Spin-echo coplanar            | 1x1x1.9              |
|                                        | Philips | Ingenia             | 3T       | 8       | 3D TFE SENSE                  | 0.9375x0.9375x1      |
| <b>McLean</b>                          | Siemens | Trio                | 3T       | 12      | MEMPRAGE<br>tfl_mgh_multiecho | 1x1x1                |
| <b>Toledo</b>                          | GE      | SignaX              | 3T       | 8       | SPGR                          | 1x1x1                |
| <b>West Haven</b>                      | Siemens | Tim Trio            | 3T       | 12      | MPRAGE                        | 1x1x1                |
| <b>Yale</b>                            | Siemens | Tim Trio            | 3T       | 32      | MPRAGE                        | 1x1x1                |
| <b>UCAS</b>                            | Philips | Achieva             | 3T       | 8       | EPI                           | 1x1x1                |
| <b>ADNIDOD</b>                         | GE      | GE Discovery MR750w | 3T       | 40      | FSPGR                         | 1x1x1.2              |
|                                        | GE      | GE Signa HDxt       | 3T       | 8       | SPGR                          | 1x1x1.2              |
|                                        | Siemens | Siemens TrioTim     | 3T       | 12      | MPRAGE                        | 1x1x1.2              |
|                                        | GE      | GE Discovery MR750w | 3T       | 8       | SPGR                          | 1x1x1.2              |
| <b>Emory GTP</b>                       | Siemens | TIM Trio            | 3T       | 12      | MPRAGE                        | 1x1x1                |
| <b>Stellenbosch</b>                    | Siemens | Allegra             | 3T       | 4       | MPRAGE                        | 1x1x1                |
|                                        | Siemens | Skyra               | 3T       | 32      | MPRAGE                        | 1x1x1                |
| <b>Columbia</b>                        | GE      | SIGNA EXCITE        | 1.5T     | 8       | SPGR                          | 3.5X3.5X2.2          |
| <b>Ghent</b>                           | Siemens | TimTrio             | 3T       | 32      | MPRAGE                        | 1x1x1                |
| <b>INTRUST</b>                         | GE      | multiple            | 3T       | 8       | SPGR-BRAVO                    | 1x1x1                |
|                                        | Siemens | multiple            | 3T       | 12      | MPRAGE                        | 1x1x1                |
|                                        | Philips | multiple            | 3T       | 8       | T1W_3D_TFESENSE               | 1x1x1                |
| <b>UNSW</b>                            | GE      | Signa Hdx           | 3T       | 8       | 3D SPGR                       | 1x1x1                |
| <b>Leiden</b>                          | Philips | Achieva             | 3T       | 8       | gradient echo T1-weightedEPI  | 1.17x1.17x1.2        |
| <b>University of Washington</b>        | Siemens | Tim Trio            | 3T       | 32      | MEMPRAGE                      | 1x1x1                |
|                                        | Philips | Achieva             | 3T       | 32      | MEMPRAGE                      | 1x1x1                |
| <b>DUKE (DeBellis)</b>                 | Siemens | Tim Trio            | 3T       | 8       | MEMPRAGE                      | 1x1x1                |
| <b>Mannheim</b>                        | Siemens | Trio                | 3T       | 32      | SPGR                          | 1x1x1                |
| <b>University of Wisconsin-Madison</b> | GE      | X750 Discovery      | 3T       | 8       | BRAVO                         | 1x1x1                |
| <b>Groningen</b>                       | Siemens | TrioTim             | 3T       | 12      | MPRAGE                        | 1x1x1                |
| <b>Booster (AMC)</b>                   | Philips | Achieva             | 3T       | 32      | FAST MPRAGE                   | 1x1x1                |

|                                       |         |                    |    |    |                            |                 |
|---------------------------------------|---------|--------------------|----|----|----------------------------|-----------------|
| <b>McLean (Rosso)</b>                 | Siemens | Tim Trio           | 3T | 32 | MEMPRAGE                   | 1.3X1X1.3       |
| <b>Stanford</b>                       | GE      | MR750              | 3T | 8  | 3D SPGR                    | 1.5x0.9x1.1     |
| <b>Minneapolis VA</b>                 | Siemens | Tim Trio           | 3T | 12 | MPRAGE                     | 1x1x1           |
| <b>Muenster</b>                       | Siemens | Magnetom Prisma    | 3T | 20 | MPRAGE                     | 1x1x1           |
| <b>WACO VA</b>                        | Philips | Achieva            | 3T | 16 | MPRAGE                     | 1x1x1           |
| <b>Univ of Wisconsin-Milwaukee</b>    | GE      | MR750 Signa Excite | 3T | 32 | SPGR                       | 1x0.9375x0.9375 |
| <b>South Dakota</b>                   | Siemens | Skyra              | 3T | 20 | MPRAGE                     | 1x1x1           |
| <b>University of Illinois-Chicago</b> | GE      | Signa              | 3T | 8  | Gradient-echo spiral pulse | 1x1x1           |
| <b>University of Cape Town</b>        | Siemens | Skyra              | 3T | 4  | MPRAGE                     | 1x1x1.5         |
|                                       | Siemens | Allegra            | 3T | 4  | MPRAGE                     | 1x1x1.5         |

(part II)

| Site                   | FOV (mm) | Acquisition Orientation | TR (ms)          | TE (s)                 | Flip Angle | Slice Thickness (mm) | FreeSurfer Version |
|------------------------|----------|-------------------------|------------------|------------------------|------------|----------------------|--------------------|
| <b>Duke University</b> | 256x256  | Axial                   | 8160             | 3.2                    | 12         | 1                    | 5.3                |
|                        | 240x240  | Axial                   | 8148, 7840, 8160 | 3.2, 2.9, 3.2          | 12         | 1                    | 5.3                |
|                        | 240x240  | Axial                   | 12000            | 5.4                    | 20         | 2                    | 5.3                |
|                        | 240x240  | Axial                   | 8148             | 3.7                    | 8          | 1                    | 5.3                |
| <b>McLean</b>          | 256      | Sagittal                | 2530             | 1.64, 3.5, 5.36, 7.22  | 7          | 1                    | 5.3                |
| <b>Toledo</b>          | 256x256  | Axial                   | 7.9              | 3                      | 9          | 1                    | 5.3                |
| <b>West Haven</b>      | 256x256  | Sagittal                | 2530             | 2.71                   | 7          | 1                    | 5.3                |
| <b>Yale</b>            | 256x256  | Sagittal                | 2500             | 2.77                   | 7          | 1                    | 5.3                |
| <b>UCAS</b>            | 220X220  | Axial                   | 8.5              | 3.7                    | 8          | 2                    | 5.3                |
| <b>ADNIDOD</b>         | 256x256  | Sagittal                | 7.652            | 3.104                  | 11         | 1.2                  | 6                  |
|                        | 256x256  | Sagittal                | 6.984            | 2.848                  | 11         | 1.2                  | 6                  |
|                        | 256x255  | Sagittal                | 2300             | 2.98                   | 9          | 1.2                  | 6                  |
|                        | 256x256  | Sagittal                | 7.34             | 3.036                  | 11         | 1.2                  | 6                  |
| <b>Emory GTP</b>       | 224x256  | Axial                   | 2600             | 3                      | 8          | 1                    | 5.3                |
| <b>Stellenbosch</b>    | 256x256  | Sagittal                | 2530             | 1.5, 3.2, 4.9, 6.6     | 7          | 1                    | 5.3                |
|                        | 280x280  | Sagittal                | 2530             | 1.63, 3.47, 5.31, 7.15 | 7          | 1                    | 5.3                |
| <b>Columbia</b>        | 224X224  | Axial                   | 3000             | 30                     | 84         | 2.2                  | 5.3                |
| <b>Ghent</b>           | 256x256  | Transversal             | 2250             | 4.18                   | 9          | 1                    | 5.3                |
| <b>INTRUST</b>         | 256x256  | Sagittal                | 9150             | 3.7                    | 10         | 1                    | 5.3                |
|                        | 256x256  | Sagittal                | 2530             | 3.32                   | 7          | 1                    | 5.3                |

|                                        |                          |                       |        |                        |    |      |     |
|----------------------------------------|--------------------------|-----------------------|--------|------------------------|----|------|-----|
|                                        | 256x256                  | Sagittal              | 7,600  | 3.5                    | 7  | 1    | 5.3 |
| <b>UNSW</b>                            | 256x256                  | Sagittal              | 8,300  | 3.24                   | 11 | 1    | 5.3 |
| <b>Leiden</b>                          | 224x177x168              | Sagittal              | 9.8    | 4.6                    | 8  | 1.2  | 5.3 |
| <b>University of Washington</b>        | 220x220                  | Sagittal              | 2530   | 1.6-7                  | 7  | 1    | 5.3 |
|                                        | 256x256                  | Sagittal              | 2530   | 3.5                    | 7  | 1    | 5.3 |
| <b>DUKE (DeBellis)</b>                 | 256x256x124              | Axial                 | 1750   | 5.17                   | 20 | 1    | 5.3 |
| <b>Mannheim</b>                        | 192x192                  | Axial                 | 2000   | 3                      | 80 | 3    | 5.3 |
| <b>University of Wisconsin-Madison</b> | 256x256                  | Axial                 | 8.16   | 3.18                   | 12 | 1    | 5.3 |
| <b>Groningen</b>                       | 256X256                  | Sagittal              | 1900   | 2.5                    | 9  | 1    | 5.3 |
| <b>Booster (AMC)</b>                   | 240x188                  | Axial                 | 8200   | 3800                   | 8  | 1    | 5.3 |
| <b>McLean (Rosso)</b>                  | 256X128                  | Sagittal              | 2530   | 3.31                   | 7  | 1.33 | 5.3 |
| <b>Stanford</b>                        | 220X220, 240x240         | Coronal               | 8, 8.6 | 3.6, 3.4               | 15 | 1.1  | 5.3 |
| <b>Minneapolis VA</b>                  | 256X256                  | Coronal               | 2530   | 3.7                    | 7  | 1    | 6   |
| <b>Muenster</b>                        | 256                      | Sagittal              | 3240   | 2.28                   | 8  | 1    | 5.3 |
| <b>WACO VA</b>                         | 288x288                  | Sagittal              | 2400   | 3.08                   | 90 | 1    | 6   |
| <b>Univ of Wisconsin-Milwaukee</b>     | 240                      | Sagittal              | 8.2    | 3.2                    | 12 | 1    | 5.3 |
| <b>South Dakota</b>                    | 240x240x180, 256x256x256 | Sagittal, interleaved | 1900   | 2.13                   | 9  | 0.9  | 5.3 |
| <b>University of Illinois-Chicago</b>  | 240x240                  | Coronal               | 25     | 6.6                    | 90 | 1    | 5.3 |
| <b>University of Cape Town</b>         | 256x256                  | Sagittal              | 2530   | 1.69, 3.55, 5.41, 7.27 | 7  | 1.5  | 5.3 |
|                                        | 256x256                  | Sagittal              | 2000   | 1.53, 3.21, 4.89, 6.57 | 20 | 1.5  | 5.3 |

Note: FOV=field of view, TR=repetition time, TE=echo time, T=Tesla, FSPGR=fast spoiled gradient echo, BRAVO = brain volume, TFE=turbo field echo, SENSE=sensitivity encoding, MEMPRAGE=multi-echo MPRAGE, MPRAGE=magnetization prepared rapid gradient echo, TFL=tensor fascia lata, MGH=Massachusetts General Hospital, SPGR=spoiled gradient echo, EPI=echo planar.

**Supplementary Table S3. Euler number (mean±SD) per hemisphere.**

| Site                                    | Left Hemisphere  |                  |          |          | Right Hemisphere |                  |          |          |
|-----------------------------------------|------------------|------------------|----------|----------|------------------|------------------|----------|----------|
|                                         | PTSD             | non-PTSD         | <i>t</i> | <i>p</i> | PTSD             | non-PTSD         | <i>t</i> | <i>p</i> |
| <b>ADNIDOD</b>                          | -                | -                | -        | -        | -                | -                | -        | -        |
| <b>Booster (AMC)</b>                    | -19.2<br>±12.7   | -18.3<br>±8.7    | -0.364   | 0.717    | -19.7<br>±9.8    | -17.4<br>±8.7    | -1.064   | 0.291    |
| <b>Columbia</b>                         | -751.5<br>±360.4 | -666.7<br>±312.8 | -1.122   | 0.265    | -778.8<br>±357.1 | -723.2<br>±313.0 | -0.740   | 0.461    |
| <b>Duke University (DeBellis)</b>       | -483.9<br>±355.5 | -322.0<br>±144.4 | -3.504   | 0.001**  | -511.2<br>±424.2 | -327.5<br>±140.9 | -3.536   | 0.001**  |
| <b>Minneapolis VAMC</b>                 | -111.9<br>±56.9  | -106.2<br>±46.2  | -0.709   | 0.480    | -121.7<br>±60.3  | -116.7<br>±53.4  | -0.572   | 0.568    |
| <b>Duke University /Durham VA</b>       | -173.4<br>±86.8  | -155.5<br>±86.5  | -1.701   | 0.090    | -165.6<br>±79.5  | -154.2<br>±81.0  | -1.168   | 0.244    |
| <b>Ghent</b>                            | -29.5<br>±17.8   | -38.1<br>±16.6   | 1.359    | 0.179    | -37.5<br>±25.0   | -35.5<br>±12.6   | -0.363   | 0.718    |
| <b>Groningen (Charité Berlin)</b>       | -                | -                | -        | -        | -                | -                | -        | -        |
| <b>University of Wisconsin (Grupe)</b>  | -168.4<br>±67.5  | -159.2<br>±70.6  | -0.472   | 0.639    | -145.9<br>±57.8  | -148.0<br>±44.8  | 0.153    | 0.879    |
| <b>Emory GTP</b>                        | -40.2<br>±18.9   | -35.8<br>±18.1   | -1.174   | 0.243    | -35.4<br>±22.0   | -34.0<br>±18.1   | -0.353   | 0.725    |
| <b>INTRUST</b>                          | -98.3<br>±89.6   | -79.8<br>±47.4   | -2.586   | 0.010*   | -100.0<br>±58.7  | -82.8<br>±43.5   | -3.191   | 0.002**  |
| <b>University of Wisconsin (Larson)</b> | -128.4<br>±103.9 | -112.1<br>±90.8  | -0.645   | 0.521    | -119.6<br>±83.6  | -125.3<br>±101.0 | 0.221    | 0.826    |
| <b>Leiden</b>                           | -                | -                | -        | -        | -                | -                | -        | -        |
| <b>Mannheim</b>                         | -                | -                | -        | -        | -                | -                | -        | -        |
| <b>McLean</b>                           | -38.9<br>±16.5   | -41.7<br>±22.7   | 0.465    | 0.644    | -36.0<br>±11.8   | -42.2<br>±19.4   | 1.344    | 0.185    |
| <b>Muenster</b>                         | -38.2<br>±17.6   | -41.5<br>±17.4   | 0.652    | 0.518    | -35.6<br>±12.3   | -33.6<br>±15.6   | -0.480   | 0.633    |
| <b>Phan</b>                             | -126.7           | -127.2           | 0.029    | 0.977    | -119.0           | -132.4           | 1.100    | 0.278    |



|                                 |                 |                 |        |       |                 |                 |        |       |
|---------------------------------|-----------------|-----------------|--------|-------|-----------------|-----------------|--------|-------|
|                                 | ±52.4           | ±60.9           |        |       | ±33.7           | ±46.2           |        |       |
| <b>McLean (Rosso)</b>           | -25.6<br>±17.2  | -28.8<br>±12.4  | 0.941  | 0.349 | -29.2<br>±13.1  | -30.2<br>±14.3  | 0.287  | 0.775 |
| <b>University of Toledo</b>     | -               | -               | -      | -     | -               | -               | -      | -     |
| <b>UCAS</b>                     | -25.9<br>±11.0  | -30.3<br>±15.0  | 1.345  | 0.183 | -23.3<br>±12.3  | -26.3<br>±15.3  | 0.871  | 0.387 |
| <b>Cape Town</b>                | -               | -               | -      | -     | -               | -               | -      | -     |
| <b>University of Washington</b> | -111.3<br>±40.1 | -110.9<br>±57.0 | -0.034 | 0.973 | -108.3<br>±46.4 | -103.9<br>±60.2 | -0.382 | 0.703 |
| <b>WACO VA</b>                  | -73.6<br>±41.0  | -65.5<br>±38.6  | -0.774 | 0.442 | -73.8<br>±44.6  | -65.0<br>±31.2  | -0.844 | 0.402 |
| <b>WestHaven VA</b>             | -36.4<br>±23.9  | -32.4<br>±14.3  | -0.774 | 0.442 | -31.0<br>±17.8  | -28.3<br>±16.6  | -0.602 | 0.550 |
| <b>Yale</b>                     | -42.8<br>±23.9  | -39.2<br>±22.1  | -0.612 | 0.543 | -38.6<br>±22.5  | -34.4<br>±14.5  | -0.945 | 0.348 |
| <b>UNSW</b>                     | -               | -               | -      | -     | -               | -               | -      | -     |
| <b>South Dakota</b>             | -84.6<br>±53.6  | -77.1<br>±38.5  | -0.832 | 0.407 | -81.0<br>±75.0  | -73.9<br>±38.4  | -0.596 | 0.552 |
| <b>Stellenbosch</b>             | -               | -               | -      | -     | -               | -               | -      | -     |
| <b>Stanford</b>                 | -66.4<br>±48.8  | -100.0<br>±0.0  | 0.683  | 0.497 | -58.7<br>±44.0  | -66.0<br>±0.0   | 0.165  | 0.870 |

Note: \*,  $p < 0.05$ ; \*\*,  $p < 0.01$ ; \*\*\*,  $p \leq 0.001$  for t tests; -, data unavailable.

**Supplementary Table S4. Cortical regions rank ordered by effect size of PTSD-related differences in cortical thickness (CT) and surface area (SA).**

| Area                      | Cortical Thickness (CT) |     |          |     |             | Effect Size                | Area   | Surface Area (SA) |        |          |        |             | Effect Size |
|---------------------------|-------------------------|-----|----------|-----|-------------|----------------------------|--------|-------------------|--------|----------|--------|-------------|-------------|
|                           | PTSD                    |     | Non-PTSD |     | Effect Size |                            |        | PTSD              |        | Non-PTSD |        | Effect Size |             |
|                           | M                       | SD  | M        | SD  |             |                            |        | M                 | SD     | M        | SD     |             |             |
| R_G_temp_sup-Plan_polar   | 3.1                     | 0.3 | 3.2      | 0.3 | -0.103      | L_S_orbital-H_Shaped       | 953.3  | 148.5             | 969.8  | 151.5    | -0.110 |             |             |
| R_S_circular_insula_inf   | 2.7                     | 0.2 | 2.7      | 0.2 | -0.098      | R_S_circular_insula_inf    | 813.9  | 99.4              | 823.0  | 103.5    | -0.090 |             |             |
| R_G_oc-temp_med-Parahip   | 3.0                     | 0.2 | 3.1      | 0.3 | -0.078      | R_S_orbital-H_Shaped       | 978.2  | 154.0             | 993.4  | 160.0    | -0.086 |             |             |
| R_G_and_S_occipital_inf   | 2.5                     | 0.2 | 2.5      | 0.2 | -0.074      | R_S_central                | 2090.6 | 247.1             | 2106.7 | 240.3    | -0.067 |             |             |
| L_G_temp_sup-Plan_tempo   | 2.5                     | 0.2 | 2.5      | 0.2 | -0.071      | L_S_cingul-Marginalis      | 763.6  | 110.4             | 772.8  | 109.5    | -0.066 |             |             |
| R_G_temp_sup-Lateral      | 3.0                     | 0.2 | 3.0      | 0.2 | -0.071      | L_G_subcallosal            | 336.5  | 126.5             | 345.1  | 130.8    | -0.063 |             |             |
| L_G_Ins_lg_and_S_cent_ins | 3.1                     | 0.3 | 3.2      | 0.3 | -0.065      | L_S_circular_insula_inf    | 959.5  | 110.4             | 967.2  | 114.7    | -0.062 |             |             |
| L_G_occipital_middle      | 2.4                     | 0.2 | 2.5      | 0.2 | -0.064      | L_S_orbital_med-olfact     | 542.9  | 108.6             | 551.7  | 110.7    | -0.060 |             |             |
| R_S_oc_middle_and_Lunatus | 2.0                     | 0.2 | 2.0      | 0.2 | -0.061      | R_G_and_S_cingul-Ant       | 1911.4 | 264.1             | 1930.6 | 266.0    | -0.058 |             |             |
| R_S_occipital_ant         | 2.3                     | 0.2 | 2.3      | 0.2 | -0.061      | R_S_orbital_med-olfact     | 554.1  | 103.2             | 561.8  | 106.8    | -0.057 |             |             |
| L_S_circular_insula_inf   | 2.7                     | 0.2 | 2.7      | 0.2 | -0.060      | L_S_oc_sup_and_transversal | 863.5  | 153.3             | 876.1  | 159.5    | -0.057 |             |             |
| L_G_and_S_occipital_inf   | 2.3                     | 0.2 | 2.3      | 0.2 | -0.059      | R_S_interm_prim-Jensen     | 320.5  | 135.3             | 329.5  | 138.4    | -0.055 |             |             |
| R_G_pariet_inf-Supramar   | 2.6                     | 0.2 | 2.7      | 0.2 | -0.056      | L_S_precentral-inf-part    | 1039.2 | 186.6             | 1053.6 | 195.5    | -0.053 |             |             |
| R_G_Ins_lg_and_S_cent_ins | 3.2                     | 0.3 | 3.3      | 0.3 | -0.055      | L_G_and_S_frontomargin     | 821.0  | 120.8             | 829.8  | 123.6    | -0.053 |             |             |
| L_G_rectus                | 2.5                     | 0.2 | 2.5      | 0.2 | -0.053      | L_G_temp_sup-Lateral       | 1400.3 | 184.7             | 1412.8 | 183.1    | -0.052 |             |             |

|                             |     |     |     |     |        |                             |        |       |        |       |        |
|-----------------------------|-----|-----|-----|-----|--------|-----------------------------|--------|-------|--------|-------|--------|
| L_S_oc_middle_and_Lunatus   | 1.9 | 0.2 | 2.0 | 0.2 | -0.052 | R_S_calcarine               | 1666.5 | 288.9 | 1685.4 | 293.3 | -0.050 |
| L_G_temporal_inf            | 2.8 | 0.2 | 2.8 | 0.2 | -0.048 | R_S_occipital_ant           | 534.2  | 140.3 | 543.6  | 140.2 | -0.048 |
| R_G_oc-temp_lat-fusifor     | 2.8 | 0.2 | 2.8 | 0.2 | -0.045 | L_S_intrapariet_and_P_trans | 2124.2 | 305.9 | 2145.9 | 303.8 | -0.046 |
| R_G_temporal_inf            | 2.8 | 0.2 | 2.8 | 0.2 | -0.043 | R_S_front_sup               | 1833.1 | 303.9 | 1853.7 | 307.2 | -0.046 |
| R_G_orbital                 | 2.7 | 0.2 | 2.7 | 0.2 | -0.043 | L_S_occipital_ant           | 543.5  | 147.2 | 552.3  | 150.5 | -0.044 |
| R_S_oc_sup_and_transversal  | 2.1 | 0.1 | 2.1 | 0.1 | -0.042 | L_G_and_S_cingul-Mid-Post   | 927.6  | 120.7 | 934.8  | 127.6 | -0.040 |
| R_Pole_temporal             | 3.2 | 0.3 | 3.3 | 0.3 | -0.041 | L_S_front_middle            | 1054.1 | 228.4 | 1068.4 | 230.5 | -0.038 |
| R_G_oc-temp_med-Lingual     | 2.0 | 0.2 | 2.1 | 0.2 | -0.041 | R_G_pariet_inf-Angular      | 2006.4 | 330.6 | 2026.3 | 340.5 | -0.038 |
| R_G_parietal_sup            | 2.3 | 0.2 | 2.3 | 0.2 | -0.040 | L_G_occipital_sup           | 1033.7 | 160.2 | 1043.3 | 169.8 | -0.038 |
| R_G_precentral              | 2.7 | 0.2 | 2.7 | 0.2 | -0.040 | R_S_cingul-Marginalis       | 906.7  | 138.4 | 914.7  | 139.7 | -0.036 |
| L_S_intrapariet_and_P_trans | 2.1 | 0.1 | 2.1 | 0.1 | -0.040 | L_S_parieto_occipital       | 1383.2 | 240.6 | 1395.0 | 241.7 | -0.036 |
| L_S_oc_sup_and_transversal  | 2.0 | 0.1 | 2.0 | 0.2 | -0.039 | L_G_insular_short           | 457.6  | 73.2  | 460.9  | 73.5  | -0.035 |
| L_G_and_S_pariacentral      | 2.3 | 0.2 | 2.3 | 0.2 | -0.039 | L_G_front_middle            | 3065.1 | 508.1 | 3096.4 | 513.2 | -0.034 |
| L_S_temporal_sup            | 2.4 | 0.1 | 2.4 | 0.1 | -0.038 | R_G_occipital_middle        | 1536.8 | 263.3 | 1552.9 | 273.4 | -0.033 |
| R_S_postcentral             | 2.0 | 0.1 | 2.1 | 0.1 | -0.037 | R_S_pericallosal            | 998.6  | 192.5 | 1010.3 | 200.9 | -0.032 |
| R_G_insular_short           | 3.4 | 0.3 | 3.4 | 0.3 | -0.037 | L_S_postcentral             | 1962.0 | 305.3 | 1977.4 | 311.3 | -0.030 |
| L_G_pariet_inf-Supramar     | 2.7 | 0.2 | 2.7 | 0.2 | -0.036 | L_G_oc-temp_med-Parahip     | 836.5  | 155.5 | 842.9  | 150.8 | -0.029 |
| R_G_pariet_inf-Angular      | 2.6 | 0.2 | 2.6 | 0.2 | -0.035 | L_S_calcarine               | 1705.5 | 311.7 | 1720.2 | 306.4 | -0.029 |

|                         |     |     |     |     |        |                             |        |       |        |       |        |
|-------------------------|-----|-----|-----|-----|--------|-----------------------------|--------|-------|--------|-------|--------|
| L_G_temp_sup-G_T_transv | 2.4 | 0.2 | 2.4 | 0.2 | -0.035 | R_G_rectus                  | 524.2  | 68.2  | 527.3  | 68.4  | -0.027 |
| R_S_orbital-H_Shaped    | 2.5 | 0.2 | 2.5 | 0.2 | -0.033 | L_G_and_S_cingul-Ant        | 1600.4 | 248.6 | 1613.4 | 246.3 | -0.026 |
| L_S_temporal_inf        | 2.4 | 0.2 | 2.4 | 0.2 | -0.032 | R_G_insular_short           | 427.5  | 84.9  | 430.4  | 82.3  | -0.024 |
| L_G_temp_sup-Lateral    | 3.0 | 0.2 | 3.0 | 0.2 | -0.031 | R_G_occipital_sup           | 1155.5 | 181.1 | 1164.4 | 190.0 | -0.023 |
| L_S_collat_transv_ant   | 2.6 | 0.3 | 2.6 | 0.3 | -0.028 | R_S_intrapariet_and_P_trans | 2203.8 | 310.6 | 2218.4 | 308.3 | -0.023 |
| R_S_precentral-sup-part | 2.3 | 0.2 | 2.3 | 0.2 | -0.027 | L_S_orbital_lateral         | 276.8  | 65.9  | 279.6  | 66.3  | -0.023 |
| L_G_orbital             | 2.7 | 0.2 | 2.7 | 0.2 | -0.025 | R_G_cingul-Post-ventral     | 201.5  | 47.2  | 203.2  | 47.2  | -0.023 |
| L_S_interprim-Jensen    | 2.3 | 0.4 | 2.3 | 0.4 | -0.024 | R_G_precuneus               | 1764.3 | 259.2 | 1778.5 | 275.6 | -0.022 |
| L_G_precentral          | 2.7 | 0.2 | 2.7 | 0.2 | -0.024 | L_S_pericallosal            | 752.0  | 155.6 | 760.6  | 164.7 | -0.022 |
| R_G_rectus              | 2.4 | 0.2 | 2.4 | 0.2 | -0.023 | R_S_oc_sup_and_transversal  | 1009.7 | 188.1 | 1018.0 | 190.4 | -0.021 |
| L_G_and_S_subcentral    | 2.6 | 0.2 | 2.6 | 0.2 | -0.023 | R_S_front_middle            | 1542.8 | 318.2 | 1556.1 | 314.9 | -0.020 |
| L_S_oc-temp_lat         | 2.4 | 0.2 | 2.4 | 0.2 | -0.022 | L_Lat_Fis-ant-Horizont      | 222.8  | 43.6  | 224.4  | 45.0  | -0.019 |
| L_G_insular_short       | 3.5 | 0.3 | 3.5 | 0.3 | -0.022 | R_G_and_S_frontomargin      | 683.2  | 99.2  | 687.6  | 96.8  | -0.018 |
| R_G_precuneus           | 2.5 | 0.2 | 2.5 | 0.2 | -0.019 | L_S_subparietal             | 747.3  | 165.3 | 754.3  | 174.7 | -0.018 |
| L_G_postcentral         | 2.1 | 0.2 | 2.1 | 0.2 | -0.019 | L_S_central                 | 2157.7 | 244.8 | 2164.2 | 247.5 | -0.016 |
| L_S_temporal_transverse | 2.4 | 0.3 | 2.4 | 0.3 | -0.018 | R_G_and_S_cingul-Mid-Ant    | 1036.7 | 150.6 | 1042.5 | 154.1 | -0.016 |
| L_S_orbital_med-olfact  | 2.3 | 0.2 | 2.3 | 0.2 | -0.018 | R_G_oc-temp_med-Parahip     | 946.2  | 176.0 | 950.9  | 184.1 | -0.015 |
| L_G_temp_sup-Plan_polar | 3.3 | 0.3 | 3.3 | 0.3 | -0.018 | L_S_circular_insula_sup     | 1192.8 | 129.0 | 1198.8 | 132.6 | -0.015 |
| R_G_occipital_          | 2.5 | 0.2 | 2.5 | 0.2 | -0.016 | R_G_temp_s                  | 1245.3 | 163.5 | 1252.3 | 169.7 | -0.012 |

| middle                          |     |     |     |     |        | up-Lateral                        |        |       |        |       |        |
|---------------------------------|-----|-----|-----|-----|--------|-----------------------------------|--------|-------|--------|-------|--------|
| L_S_postcentral                 | 2.1 | 0.1 | 2.1 | 0.1 | -0.016 | R_S_collat_tr<br>ansv_ant         | 697.5  | 162.7 | 702.9  | 165.7 | -0.011 |
| R_G_temp_sup-<br>Plan_tempo     | 2.5 | 0.2 | 2.5 | 0.2 | -0.015 | R_S_tempora<br>l_transverse       | 204.6  | 45.4  | 205.9  | 45.8  | -0.010 |
| R_S_collat_tran<br>sv_post      | 2.1 | 0.2 | 2.1 | 0.2 | -0.014 | L_S_temporal<br>_transverse       | 251.4  | 57.7  | 252.8  | 56.6  | -0.009 |
| L_S_central                     | 1.9 | 0.1 | 1.9 | 0.1 | -0.013 | R_S_parieto<br>occipital          | 1501.1 | 256.4 | 1509.5 | 259.1 | -0.009 |
| R_G_and_S_tra<br>nsv_frontopol  | 2.5 | 0.2 | 2.5 | 0.2 | -0.010 | R_S_oc_midd<br>le_and_Lunat<br>us | 676.9  | 181.3 | 683.2  | 180.8 | -0.009 |
| L_S_collat_trans<br>v_post      | 2.0 | 0.2 | 2.1 | 0.2 | -0.010 | R_G_and_S_<br>occipital_inf       | 897.0  | 159.3 | 901.4  | 164.3 | -0.008 |
| L_G_oc-<br>temp_med-<br>Parahip | 3.0 | 0.3 | 3.0 | 0.3 | -0.009 | R_G_oc-<br>temp_med-<br>Lingual   | 1960.7 | 290.9 | 1970.2 | 300.0 | -0.008 |
| L_S_precentral-<br>sup-part     | 2.4 | 0.2 | 2.4 | 0.2 | -0.009 | R_S_circular-<br>insula_sup       | 947.1  | 118.5 | 951.3  | 119.8 | -0.008 |
| R_S_front_sup                   | 2.4 | 0.2 | 2.4 | 0.2 | -0.009 | R_G_oc-<br>temp_lat-<br>fusifor   | 1302.7 | 249.4 | 1309.8 | 243.8 | -0.008 |
| L_S_occipital_a<br>nt           | 2.2 | 0.2 | 2.2 | 0.2 | -0.009 | R_G_tempora<br>l_middle           | 2021.0 | 282.8 | 2033.4 | 295.8 | -0.007 |
| L_G_parietal_su<br>p            | 2.3 | 0.2 | 2.3 | 0.2 | -0.007 | L_G_and_S_<br>cingul-Mid-<br>Ant  | 970.7  | 158.9 | 975.8  | 164.5 | -0.006 |
| R_G_occipital_s<br>up           | 2.1 | 0.2 | 2.1 | 0.2 | -0.007 | L_S_front_su<br>p                 | 2009.2 | 327.8 | 2020.8 | 324.6 | -0.006 |
| L_G_pariet_inf-<br>Angular      | 2.6 | 0.2 | 2.6 | 0.2 | -0.006 | R_S_front_inf                     | 1453.8 | 259.6 | 1463.1 | 253.1 | -0.005 |
| L_Lat_Fis-post                  | 2.4 | 0.2 | 2.4 | 0.2 | -0.006 | R_S_subpari<br>etal               | 856.3  | 193.7 | 861.4  | 211.5 | -0.005 |
| R_S_central                     | 1.9 | 0.1 | 1.9 | 0.1 | -0.005 | L_G_oc-<br>temp_lat-<br>fusifor   | 1281.1 | 232.8 | 1287.4 | 237.0 | -0.005 |
| L_G_temporal_<br>middle         | 2.9 | 0.2 | 3.0 | 0.2 | -0.005 | L_G_orbital                       | 1718.0 | 204.4 | 1725.2 | 208.5 | -0.004 |
| L_G_occipital_s<br>up           | 2.1 | 0.2 | 2.1 | 0.2 | -0.004 | R_G_front_su<br>p                 | 4583.4 | 569.1 | 4607.9 | 581.4 | -0.004 |

|                              |     |     |     |     |        |                              |        |       |        |       |        |
|------------------------------|-----|-----|-----|-----|--------|------------------------------|--------|-------|--------|-------|--------|
| R_S_oc-temp_lat              | 2.5 | 0.2 | 2.5 | 0.2 | -0.004 | L_S_suborbit al              | 457.6  | 85.3  | 458.8  | 85.1  | -0.003 |
| R_Pole_occipital             | 1.9 | 0.1 | 1.9 | 0.2 | -0.003 | L_S_front_inf                | 1613.7 | 282.1 | 1623.0 | 295.2 | -0.003 |
| R_G_cingul-Post-ventral      | 2.7 | 0.3 | 2.7 | 0.3 | -0.002 | L_G_cingul-Post-ventral      | 216.0  | 57.2  | 217.4  | 60.2  | -0.002 |
| L_G_oc-temp_lat-fusifor      | 2.7 | 0.2 | 2.7 | 0.2 | -0.002 | L_G_pariet_in f-Angular      | 1694.0 | 276.2 | 1702.7 | 281.5 | 0.000  |
| R_S_temporal_s up            | 2.5 | 0.1 | 2.5 | 0.1 | 0.000  | R_S_tempora l_inf            | 866.1  | 196.3 | 871.2  | 207.4 | 0.000  |
| L_S_front_inf                | 2.2 | 0.2 | 2.3 | 0.2 | 0.000  | R_G_subcallo sal             | 260.8  | 89.1  | 262.1  | 88.0  | 0.000  |
| R_S_parieto_oc cipital       | 2.2 | 0.2 | 2.2 | 0.2 | 0.001  | L_S_oc-temp_med_a nd_Lingual | 1452.8 | 215.4 | 1458.4 | 226.7 | 0.001  |
| L_S_parieto_occ ipital       | 2.2 | 0.2 | 2.2 | 0.2 | 0.001  | R_G_orbital                  | 1841.9 | 224.4 | 1849.6 | 222.8 | 0.001  |
| R_S_intrapariet_ and_P_trans | 2.1 | 0.1 | 2.1 | 0.1 | 0.002  | R_G_and_S_ subcentral        | 924.5  | 135.4 | 928.3  | 143.6 | 0.003  |
| L_S_pericallosal             | 2.2 | 0.3 | 2.2 | 0.3 | 0.002  | R_G_cuneus                   | 1439.4 | 215.8 | 1443.9 | 228.5 | 0.005  |
| L_G_front_inf-Opercular      | 2.7 | 0.2 | 2.8 | 0.2 | 0.003  | L_G_oc-temp_med- Lingual     | 2028.5 | 323.0 | 2035.2 | 328.8 | 0.005  |
| L_Pole_occipital             | 1.9 | 0.2 | 1.9 | 0.2 | 0.005  | L_S_oc_midd le_and_Lunat us  | 757.8  | 178.6 | 760.7  | 177.9 | 0.007  |
| L_S_oc-temp_med_and_ Lingual | 2.4 | 0.2 | 2.4 | 0.2 | 0.005  | L_S_temporal _inf            | 981.7  | 230.1 | 985.5  | 226.6 | 0.007  |
| R_S_circular_in sula_ant     | 2.8 | 0.2 | 2.8 | 0.3 | 0.006  | L_G_cingul-Post-dorsal       | 401.7  | 85.0  | 403.3  | 90.3  | 0.008  |
| L_S_circular_ins ula_ant     | 2.8 | 0.2 | 2.8 | 0.3 | 0.006  | L_Lat_Fis- post              | 808.1  | 123.0 | 810.5  | 129.2 | 0.008  |
| L_G_precuneus                | 2.5 | 0.2 | 2.5 | 0.2 | 0.006  | R_S_oc-temp_med_a nd_Lingual | 1386.3 | 207.6 | 1390.0 | 204.4 | 0.008  |
| L_Pole_tempora l             | 3.2 | 0.3 | 3.2 | 0.3 | 0.007  | L_S_temporal _sup            | 3850.5 | 525.8 | 3863.9 | 526.1 | 0.009  |
| L_G_and_S_cin gul-Mid-Post   | 2.6 | 0.2 | 2.6 | 0.2 | 0.008  | L_G_parietal_ sup            | 2010.5 | 331.6 | 2019.5 | 324.5 | 0.009  |
| R_S_interm_pri               | 2.2 | 0.2 | 2.2 | 0.2 | 0.008  | L_S_interm_p                 | 245.2  | 122.5 | 245.5  | 122.3 | 0.009  |

| m-Jensen                       |     |     |     |     |       | rim-Jensen                        |        |       |        |       |       |
|--------------------------------|-----|-----|-----|-----|-------|-----------------------------------|--------|-------|--------|-------|-------|
| R_S_suborbital                 | 2.5 | 0.4 | 2.5 | 0.4 | 0.008 | L_G_tempora<br>l_inf              | 1833.4 | 311.7 | 1840.3 | 322.6 | 0.010 |
| R_G_postcentral                | 2.1 | 0.2 | 2.1 | 0.2 | 0.008 | L_S_circular_<br>insula_ant       | 351.7  | 62.0  | 352.7  | 62.2  | 0.011 |
| R_G_cuneus                     | 1.8 | 0.1 | 1.8 | 0.1 | 0.009 | R_Pole_temp<br>oral               | 1205.7 | 143.8 | 1207.8 | 144.7 | 0.011 |
| R_G_front_midd<br>le           | 2.6 | 0.2 | 2.6 | 0.2 | 0.009 | R_G_front_mi<br>ddle              | 2780.5 | 460.6 | 2794.7 | 478.4 | 0.011 |
| L_G_front_middl<br>e           | 2.6 | 0.2 | 2.6 | 0.2 | 0.010 | L_G_precune<br>us                 | 1788.6 | 280.2 | 1796.1 | 294.3 | 0.012 |
| L_G_subcallosal                | 2.5 | 0.4 | 2.5 | 0.4 | 0.011 | R_S_orbital_l<br>ateral           | 321.2  | 82.2  | 321.9  | 81.7  | 0.012 |
| L_Lat_Fis-ant-<br>Vertical     | 2.4 | 0.3 | 2.4 | 0.3 | 0.012 | R_G_and_S_<br>cingul-Mid-<br>Post | 1003.9 | 142.3 | 1006.8 | 146.0 | 0.013 |
| L_Lat_Fis-ant-<br>Horizont     | 2.2 | 0.3 | 2.3 | 0.3 | 0.013 | R_G_postcen<br>tral               | 1381.6 | 208.8 | 1386.8 | 198.7 | 0.013 |
| R_G_subcallosa<br>l            | 2.4 | 0.4 | 2.4 | 0.4 | 0.015 | R_G_and_S_<br>paracentral         | 883.0  | 131.5 | 885.1  | 126.3 | 0.015 |
| L_G_and_S_cin<br>gul-Ant       | 2.7 | 0.2 | 2.7 | 0.2 | 0.017 | R_S_precentr<br>al-sup-part       | 985.7  | 211.5 | 986.1  | 204.8 | 0.015 |
| L_S_precentral-<br>inf-part    | 2.4 | 0.2 | 2.4 | 0.2 | 0.017 | L_G_Ins_lg_a<br>nd_S_cent_in<br>s | 345.0  | 57.5  | 345.0  | 56.3  | 0.016 |
| R_G_and_S_cin<br>gul-Ant       | 2.6 | 0.2 | 2.6 | 0.2 | 0.017 | L_G_tempora<br>l_middle           | 1898.8 | 289.8 | 1906.1 | 298.1 | 0.016 |
| L_S_suborbital                 | 2.5 | 0.3 | 2.5 | 0.3 | 0.019 | L_S_collat_tr<br>ansv_post        | 296.8  | 69.3  | 296.5  | 69.2  | 0.016 |
| R_G_front_sup                  | 2.8 | 0.2 | 2.8 | 0.2 | 0.021 | L_G_front_inf<br>-Orbital         | 229.5  | 56.4  | 229.5  | 58.2  | 0.018 |
| R_G_temp_sup-<br>G_T_transv    | 2.4 | 0.2 | 2.4 | 0.2 | 0.021 | R_Lat_Fis-<br>ant-Horizont        | 272.7  | 55.2  | 272.8  | 56.2  | 0.019 |
| L_G_and_S_tra<br>nsv_frontopol | 2.6 | 0.2 | 2.6 | 0.2 | 0.022 | L_S_collat_tr<br>ansv_ant         | 670.5  | 162.4 | 671.3  | 164.7 | 0.020 |
| L_G_cuneus                     | 1.8 | 0.1 | 1.8 | 0.1 | 0.023 | R_G_temp_s<br>up-<br>G_T_transv   | 274.3  | 57.6  | 274.6  | 56.6  | 0.020 |
| R_S_oc-<br>temp_med_and_       | 2.4 | 0.2 | 2.4 | 0.2 | 0.023 | L_G_pariet_in<br>f-Supramar       | 2006.4 | 329.6 | 2012.0 | 335.7 | 0.021 |

|                                  |     |     |     |     |       |                                     |        |       |        |       |       |  |
|----------------------------------|-----|-----|-----|-----|-------|-------------------------------------|--------|-------|--------|-------|-------|--|
| Lingual                          |     |     |     |     |       |                                     |        |       |        |       |       |  |
| R_G_temporal_middle              | 3.0 | 0.2 | 3.0 | 0.2 | 0.026 | R_S_postcentral                     | 1691.2 | 306.1 | 1694.2 | 301.0 | 0.022 |  |
| R_S_front_middle                 | 2.1 | 0.2 | 2.1 | 0.2 | 0.026 | L_G_postcentral                     | 1516.7 | 222.3 | 1520.9 | 224.4 | 0.023 |  |
| R_S_temporal_inferior            | 2.5 | 0.2 | 2.5 | 0.2 | 0.027 | L_G_temporal-sup-G_T_transverse     | 362.6  | 76.7  | 362.2  | 76.3  | 0.024 |  |
| L_S_orbital_lateral              | 2.2 | 0.3 | 2.2 | 0.3 | 0.027 | R_G_cingulum-Post-dorsal            | 374.6  | 79.5  | 375.4  | 82.3  | 0.024 |  |
| R_G_front_inferior-Orbital       | 2.7 | 0.3 | 2.7 | 0.3 | 0.027 | R_G_parietal_sup                    | 1648.5 | 263.0 | 1651.5 | 263.4 | 0.025 |  |
| L_G_and_S_cingulum-Mid-Anterior  | 2.7 | 0.2 | 2.7 | 0.2 | 0.029 | R_G_front_inferior-Orbital          | 254.1  | 57.7  | 253.3  | 57.7  | 0.027 |  |
| L_G_and_S_frontomarginal         | 2.3 | 0.2 | 2.3 | 0.2 | 0.029 | L_G_temporal-sup-Planum-temporale   | 692.1  | 148.3 | 692.0  | 146.6 | 0.027 |  |
| R_S_calcarine                    | 1.9 | 0.1 | 1.9 | 0.1 | 0.029 | R_S_circular_insula_anterior        | 409.0  | 76.7  | 408.8  | 74.2  | 0.028 |  |
| R_G_and_S_cingulum-Mid-Anterior  | 2.7 | 0.2 | 2.7 | 0.2 | 0.030 | L_Pole_temporal                     | 1196.5 | 153.0 | 1196.0 | 152.1 | 0.028 |  |
| R_G_and_S_subcentral             | 2.6 | 0.2 | 2.6 | 0.2 | 0.030 | L_G_frontal-sup                     | 4896.9 | 615.5 | 4908.2 | 614.2 | 0.031 |  |
| L_G_front_inferior-Orbital       | 2.8 | 0.3 | 2.8 | 0.3 | 0.031 | R_S_occipital-temporal_lateral      | 708.1  | 158.1 | 707.4  | 156.0 | 0.032 |  |
| L_S_frontal-sup                  | 2.4 | 0.2 | 2.4 | 0.2 | 0.031 | R_G_precentral                      | 1748.7 | 251.3 | 1749.7 | 258.6 | 0.032 |  |
| R_G_and_S_parietal-acentral      | 2.2 | 0.2 | 2.2 | 0.2 | 0.037 | R_Lat_Fis-posterior                 | 980.8  | 118.8 | 980.0  | 117.0 | 0.033 |  |
| R_Lat_Fis-anterior-Vertical      | 2.4 | 0.3 | 2.4 | 0.3 | 0.038 | R_G_temporal_inferior               | 1752.0 | 284.3 | 1753.0 | 294.5 | 0.033 |  |
| R_G_cingulum-Post-dorsal         | 2.9 | 0.2 | 2.9 | 0.2 | 0.041 | L_G_and_S_occipital_inferior        | 1114.3 | 195.2 | 1112.9 | 191.1 | 0.033 |  |
| R_S_temporal_transverse          | 2.5 | 0.3 | 2.5 | 0.3 | 0.042 | R_G_parietal_inferior-Supramarginal | 1829.5 | 307.0 | 1832.8 | 306.1 | 0.033 |  |
| R_G_and_S_cingulum-Mid-Posterior | 2.6 | 0.2 | 2.6 | 0.2 | 0.043 | L_Pole_occipital                    | 1456.1 | 206.4 | 1454.9 | 210.9 | 0.035 |  |
| L_G_frontal-sup                  | 2.8 | 0.2 | 2.9 | 0.2 | 0.043 | L_G_frontal_inferior-Opercular      | 960.0  | 159.0 | 960.0  | 159.1 | 0.038 |  |
| R_Lat_Fis-posterior              | 2.4 | 0.2 | 2.4 | 0.2 | 0.043 | L_S_occipital-temporal_lateral      | 650.8  | 146.1 | 649.4  | 150.3 | 0.039 |  |



|                         |     |     |     |     |       |                             |        |       |        |       |       |
|-------------------------|-----|-----|-----|-----|-------|-----------------------------|--------|-------|--------|-------|-------|
| R_G_front_inf-Opercular | 2.7 | 0.2 | 2.7 | 0.2 | 0.046 | R_G_front_inf-Triangul      | 740.4  | 162.0 | 738.0  | 159.5 | 0.041 |
| R_S_precentral-inf-part | 2.4 | 0.2 | 2.4 | 0.2 | 0.046 | R_G_temp_sup-Plan_tempo     | 572.0  | 109.4 | 570.6  | 108.1 | 0.042 |
| L_S_orbital-H_Shaped    | 2.6 | 0.2 | 2.6 | 0.2 | 0.047 | L_G_and_S_transv_frontopoli | 494.8  | 90.5  | 493.5  | 93.1  | 0.044 |
| R_S_circular_insula_sup | 2.6 | 0.2 | 2.6 | 0.2 | 0.050 | R_Lat_Fis-ant-Vertical      | 154.7  | 51.1  | 153.4  | 51.6  | 0.044 |
| R_G_front_inf-Triangul  | 2.6 | 0.2 | 2.6 | 0.2 | 0.051 | L_G_and_S_subcentral        | 1016.3 | 144.0 | 1015.9 | 150.0 | 0.044 |
| R_S_orbital_med-olfact  | 2.2 | 0.2 | 2.2 | 0.2 | 0.052 | L_G_cuneus                  | 1348.4 | 221.9 | 1344.9 | 227.2 | 0.045 |
| L_S_circular_insula_sup | 2.6 | 0.2 | 2.6 | 0.2 | 0.052 | R_S_temporali_sup           | 4174.0 | 561.8 | 4175.3 | 558.2 | 0.048 |
| R_S_orbital_lateral     | 2.1 | 0.3 | 2.1 | 0.3 | 0.053 | L_G_occipital_middle        | 1457.1 | 247.1 | 1454.6 | 249.7 | 0.055 |
| R_Lat_Fis-ant-Horizont  | 2.2 | 0.2 | 2.2 | 0.2 | 0.053 | L_G_rectus                  | 689.9  | 84.4  | 688.4  | 83.6  | 0.056 |
| L_G_cingul-Post-dorsal  | 2.9 | 0.2 | 2.9 | 0.2 | 0.056 | R_G_Ins_lg_and_S_cent_ins   | 351.0  | 63.2  | 349.2  | 62.6  | 0.057 |
| L_S_cingul-Marginalis   | 2.2 | 0.2 | 2.2 | 0.2 | 0.057 | R_S_precentral-inf-part     | 1134.0 | 206.2 | 1129.0 | 202.1 | 0.058 |
| L_S_calcarine           | 1.9 | 0.1 | 1.9 | 0.1 | 0.057 | L_G_front_inf-Triangul      | 787.3  | 160.5 | 782.6  | 158.5 | 0.059 |
| L_G_cingul-Post-ventral | 2.4 | 0.3 | 2.4 | 0.3 | 0.057 | R_S_collat_transv_post      | 355.2  | 99.9  | 351.4  | 97.2  | 0.060 |
| L_G_oc-temp_med-Lingual | 2.0 | 0.2 | 2.0 | 0.2 | 0.057 | R_S_suborbital              | 226.9  | 75.4  | 223.2  | 77.4  | 0.061 |
| R_G_and_S_frontomargin  | 2.3 | 0.2 | 2.3 | 0.2 | 0.058 | R_Pole_occipital            | 2226.5 | 308.0 | 2217.7 | 312.6 | 0.064 |
| R_S_collat_transv_ant   | 2.6 | 0.3 | 2.6 | 0.3 | 0.068 | R_G_front_inf-Opercular     | 893.3  | 156.4 | 887.7  | 157.5 | 0.065 |
| L_S_subparietal         | 2.3 | 0.2 | 2.3 | 0.2 | 0.074 | R_G_and_S_transv_frontopol  | 788.2  | 142.2 | 782.9  | 140.9 | 0.069 |
| R_S_pericallosal        | 2.2 | 0.3 | 2.2 | 0.3 | 0.079 | L_G_precentral              | 1741.6 | 240.8 | 1736.4 | 240.0 | 0.072 |

|                        |     |     |     |     |       |                         |       |       |       |       |       |
|------------------------|-----|-----|-----|-----|-------|-------------------------|-------|-------|-------|-------|-------|
| R_S_cingul-Marginalis  | 2.3 | 0.2 | 2.3 | 0.2 | 0.080 | L_G_and_S_paracentral   | 993.2 | 143.5 | 988.1 | 138.1 | 0.072 |
| R_S_subparietal        | 2.4 | 0.2 | 2.4 | 0.2 | 0.082 | L_Lat_Fis-ant-Vertical  | 206.2 | 61.8  | 203.0 | 60.0  | 0.073 |
| L_G_front_inf-Triangul | 2.6 | 0.2 | 2.6 | 0.2 | 0.087 | L_G_temp_sup-Plan_polar | 434.1 | 96.4  | 430.3 | 93.9  | 0.074 |
| L_S_front_middle       | 2.2 | 0.2 | 2.2 | 0.2 | 0.103 | L_S_precentral-sup-part | 946.4 | 189.9 | 936.4 | 184.5 | 0.079 |
| R_S_front_inf          | 2.2 | 0.2 | 2.2 | 0.2 | 0.112 | R_G_temp_sup-Plan_polar | 500.5 | 102.8 | 495.6 | 102.7 | 0.083 |

Note: Negative (positive) effect size represents lower (higher) CT and SA in patients with PTSD than non-PTSD participants. M = mean, SD = standard deviation, L = left, R = right, G = gyrus, S = sulcus.

**Supplementary Table S5. Number of participants per subgroup for the analyses of PTSD x sex interaction.**

|               | <u>CT-based Network</u> |          | <u>SA-based Network</u> |          |
|---------------|-------------------------|----------|-------------------------|----------|
|               | PTSD                    | non-PTSD | PTSD                    | non-PTSD |
| <b>Male</b>   | 725                     | 1106     | 729                     | 1102     |
| <b>Female</b> | 619                     | 967      | 619                     | 964      |

**Supplementary Table S6. Number of participants per subgroup for the analyses of PTSD x age interaction.**

|            | <u>CT-based Network</u> |          | <u>SA-based Network</u> |          |
|------------|-------------------------|----------|-------------------------|----------|
|            | PTSD                    | non-PTSD | PTSD                    | non-PTSD |
| Age<10     | 27                      | 64       | 26                      | 66       |
| 10<=Age<15 | 40                      | 138      | 41                      | 138      |
| 15<=Age<20 | 49                      | 148      | 49                      | 148      |
| 20<=Age<30 | 347                     | 550      | 348                     | 545      |
| 30<=Age<40 | 375                     | 420      | 377                     | 416      |
| 40<=Age<50 | 251                     | 358      | 252                     | 360      |
| 50<=Age<60 | 143                     | 235      | 143                     | 233      |
| Age>=60    | 112                     | 160      | 112                     | 160      |

**Supplementary Table S7. Number of participants per subgroup for the analyses of PTSD x depression interaction.**

|                           | <u>CT-based Network</u> |          | <u>SA-based Network</u> |          |
|---------------------------|-------------------------|----------|-------------------------|----------|
|                           | PTSD                    | non-PTSD | PTSD                    | non-PTSD |
| <b>with depression</b>    | 669                     | 358      | 734                     | 360      |
| <b>without depression</b> | 388                     | 1370     | 396                     | 1356     |

**Supplementary Table S8. Number of participants per subgroup for the analyses of PTSD symptom severity.**

|                        | <b>CT-based</b> | <b>SA-based</b> |
|------------------------|-----------------|-----------------|
| Very Low (CAPS<4)      | 282             | 280             |
| Low (4<=CAPS<20)       | 282             | 279             |
| Moderate (20<=CAPS<46) | 300             | 293             |
| High (46<=CAPS<68)     | 289             | 284             |
| Very High (CAPS>=68)   | 292             | 293             |
